# Supplementary material for: Olfactory Dysfunction and Its Relationship with Clinical Symptoms of Alzheimer Disease
Source: PubMed Central journal article supplement (PMC6284764; doi:10.14336/ad.2018.0819), 2018-12-04
Supplement: AD-9-6-1084-s.pdf [file AD-9-6-1084-s.pdf]

## **Olfactory Dysfunction and Its Relationship with Clinical Symptoms of Alzheimer Disease**

**Qiujin Yu<sup>1</sup>, Peng Guo<sup>2</sup>, Danning Li<sup>1</sup>, Lijun Zuo<sup>2</sup>, Tenghong Lian<sup>1</sup>, Shuyang Yu<sup>2</sup>, Yang Hu<sup>2</sup>, Li Liu<sup>2</sup>, Zhao Jin<sup>1</sup>, Ruidan Wang<sup>1</sup>, Yingshan Piao<sup>2</sup>, Lixia Li<sup>2</sup>, Xiaomin Wang<sup>3,4,5,6</sup>, Wei Zhang<sup>1,2,4,5,6,7,\*</sup>**

<sup>1</sup>Department of Neurology, Beijing Tiantan Hospital, Capital Medical University, Beijing, 100050, China.

<sup>2</sup>Department of Geriatrics, Beijing Tiantan Hospital, Capital Medical University, Beijing, 100050, China.

<sup>3</sup>Department of Physiology, Capital Medical University, Beijing, 100069, China. <sup>4</sup>Key Laboratory for Neurodegenerative Disorders of the Ministry of Education, Capital Medical University, Beijing, 100069, China.

<sup>5</sup>Center of Parkinson Disease, Beijing Institute for Brain Disorders, Beijing, 100069, China. <sup>6</sup>Beijing Key Laboratory on Parkinson Disease, Beijing, 100053, China. <sup>7</sup>China National Clinical Research Center for Neurological Diseases, Beijing, 100050, China

# SUPPLEMENTARY DATA

**Supplementary Table 1.** Correlation between olfactory function and global cognitive function in AD patients

|     | MMSE  |                | MoCA  |                |
|-----|-------|----------------|-------|----------------|
|     | r     | P              | r     | P              |
| TDI | 0.630 | <b>0.000**</b> | 0.540 | <b>0.000**</b> |
| THR | 0.290 | <b>0.004**</b> | 0.227 | <b>0.027*</b>  |
| DIS | 0.583 | <b>0.000**</b> | 0.490 | <b>0.000**</b> |
| ID  | 0.617 | <b>0.000**</b> | 0.540 | <b>0.000**</b> |

\*,  $P < 0.05$ , \*\*,  $P < 0.01$

Abbreviations: **TDI**=Threshold+Discrimination+Identification; **THR**=Threshold; **DIS**= Discrimination; **ID**= Identification; **MMSE** = Mini-Mental State Examination; **MoCA** = Montreal Cognitive Assessment.

**Supplementary Table 2.** Correlation between olfactory function and memory in AD patients.

|     | AVLT- long delayed recall |                | AVLT- the first 5 times total recall |                | CFT- delayed memory |                |
|-----|---------------------------|----------------|--------------------------------------|----------------|---------------------|----------------|
|     | r                         | P              | r                                    | P              | r                   | P              |
| TDI | 0.418                     | <b>0.000**</b> | 0.462                                | <b>0.000**</b> | 0.387               | <b>0.002**</b> |
| THR | 0.239                     | <b>0.027*</b>  | 0.248                                | <b>0.021*</b>  | 0.345               | <b>0.007**</b> |
| DIS | 0.334                     | <b>0.002**</b> | 0.377                                | <b>0.000**</b> | 0.392               | <b>0.002**</b> |
| ID  | 0.411                     | <b>0.000**</b> | 0.458                                | <b>0.000**</b> | 0.180               | 0.168          |

\*,  $P < 0.05$ , \*\*,  $P < 0.01$

Abbreviations: **TDI**=Threshold+Discrimination+Identification; **THR**=Threshold; **DIS**= Discrimination; **ID**= Identification; **AVLT** = Auditory Verbal Learning Test; **CFT** = Complex Figure Test.

**Supplementary Table 3.** Correlation between olfactory function and attention and visual spatial function in AD patients.

|     | SDMT  |                | TMT-A  |                | CFT-imitation |                |
|-----|-------|----------------|--------|----------------|---------------|----------------|
|     | r     | P              | r      | P              | r             | P              |
| TDI | 0.308 | <b>0.009**</b> | -0.447 | <b>0.000**</b> | 0.342         | <b>0.005**</b> |
| THR | 0.174 | 0.146          | -0.100 | 0.364          | 0.242         | 0.051          |
| DIS | 0.286 | <b>0.016*</b>  | -0.427 | <b>0.000**</b> | 0.396         | <b>0.001**</b> |
| ID  | 0.264 | <b>0.026*</b>  | -0.469 | <b>0.000**</b> | 0.180         | 0.149          |

\*,  $P < 0.05$ , \*\*,  $P < 0.01$

Abbreviations: **TDI**=Threshold+Discrimination+Identification; **THR**=Threshold; **DIS**= Discrimination; **ID**= Identification; **SDMT** = Symbol Digit Modalities Test; **TMT** = Trial Making Test; **CFT** = Complex Figure Test.

# SUPPLEMENTARY DATA

**Supplementary Table 4.** Correlation between olfactory function and MAES in AD patients.

|     | r      | P             |
|-----|--------|---------------|
| TDI | -0.249 | <b>0.016*</b> |
| THR | -0.171 | 0.103         |
| DIS | -0.225 | <b>0.031*</b> |
| ID  | -0.210 | <b>0.044*</b> |

\*:  $P < 0.05$

Abbreviations: **TDI**=Threshold+Discrimination+Identification; **THR**=Threshold; **DIS**= Discrimination; **ID**= Identification; **MAES** = Modified Apathy Evaluation Scale.

**Supplementary Table 5.** Correlation between olfactory function and ADL in AD patients.

|     | r      | P              |
|-----|--------|----------------|
| TDI | -0.513 | <b>0.010*</b>  |
| THR | -0.274 | <b>0.009**</b> |
| DIS | -0.487 | <b>0.000**</b> |
| ID  | -0.468 | <b>0.000**</b> |

\*:  $P < 0.05$ , \*\*:  $P < 0.01$

Abbreviations: **TDI**=Threshold+Discrimination+Identification; **THR**=Threshold; **DIS**= Discrimination; **ID**= Identification; **ADL**= Activity of Daily Living
